# Supplementary material for: Differential CpG methylation at Nnat in the early establishment of beta cell heterogeneity
Source: PubMed Central journal article supplement — bioRxiv. 2023 Nov 30:2023.02.04.527050. Preprint. [Version 2] doi: 10.1101/2023.02.04.527050 (PMC10705251; doi:10.1101/2023.02.04.527050), 2023-11-30
Supplement: media-5.pdf [file media-5.pdf]

| Unique identifier | ID             | Sex | Age | Body mass index (BMI, KG/m <sup>2</sup> ) |
|-------------------|----------------|-----|-----|-------------------------------------------|
| 18/40             | HP 25/08/2012  | M   | 17  | 24.5                                      |
| 26/88             | HP 11/08/2020  | F   | 15  | 24.7                                      |
| 27/119            | HP 22/11/2021  | M   | 18  | 20.4                                      |
| 20/46             | HP 25/08/2014B | M   | 15  | 19.5                                      |
| 20/60             | HP 27/09/2014  | M   | 13  | 25.4                                      |
| 18/29             | HP 20/06/2012  | F   | 60  | 20.8                                      |
| 17/71             | HP 18/11/2011  | M   | 71  | 25.4                                      |
| 17/17             | HP 18/03/2011  | M   | 78  | 24.2                                      |
| 16/58             | HP 20/12/2010  | F   | 75  | 23.4                                      |
